# Supplementary material
Source: PubMed Central journal article supplement (PMC5870759)
Supplement: NIHMS946746-supplement.pdf [file NIHMS946746-supplement.pdf]

Cell Stem Cell

Supplemental Information

**The Isl1/Ldb1 Complex Orchestrates Genome-wide  
Chromatin Organization to Instruct Differentiation  
of Multipotent Cardiac Progenitors**

Luca Caputo, Hagen R. Witzel, Petros Kolovos, Sirisha Cheedipudi, Mario Looso,  
Athina Mylona, Wilfred F.J. van IJcken, Karl-Ludwig Laugwitz, Sylvia M. Evans, Thomas  
Braun, Eric Soler, Frank Grosveld, and Gergana Dobreva

SUPPLEMENTAL FIGURES

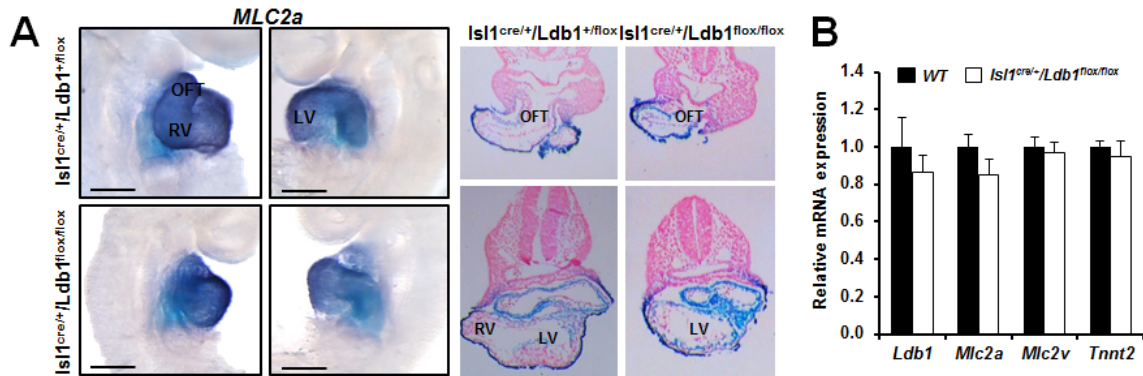

**Figure S1, related to Figure 1. Aberrant cardiac morphology in *Isl1<sup>cre/+</sup>/Ldb1<sup>flox/flox</sup>* embryos.**

**(A)** Left and right views of E9.5 control and *Isl1<sup>cre/+</sup>/Ldb1<sup>flox/flox</sup>* embryos after in situ hybridization with an *Mlc2a* riboprobe and corresponding sections, demonstrating aberrant cardiac morphology. *Mlc2a* in situ hybridization was used to stain the cardiac tissue to help with the visualization of the heart and was not performed in a quantitative manner. Scale bars, 500  $\mu$ m. Abbreviations: OFT, outflow tract; RV, right ventricle; LV, left ventricle. **(B)** Relative mRNA expression analysis of cardiomyocyte genes in dissected left ventricles of E9.25 control and *Isl1<sup>cre/+</sup>/Ldb1<sup>flox/flox</sup>* embryos. Data are mean  $\pm$  SEMs, n=3 for each genotype.

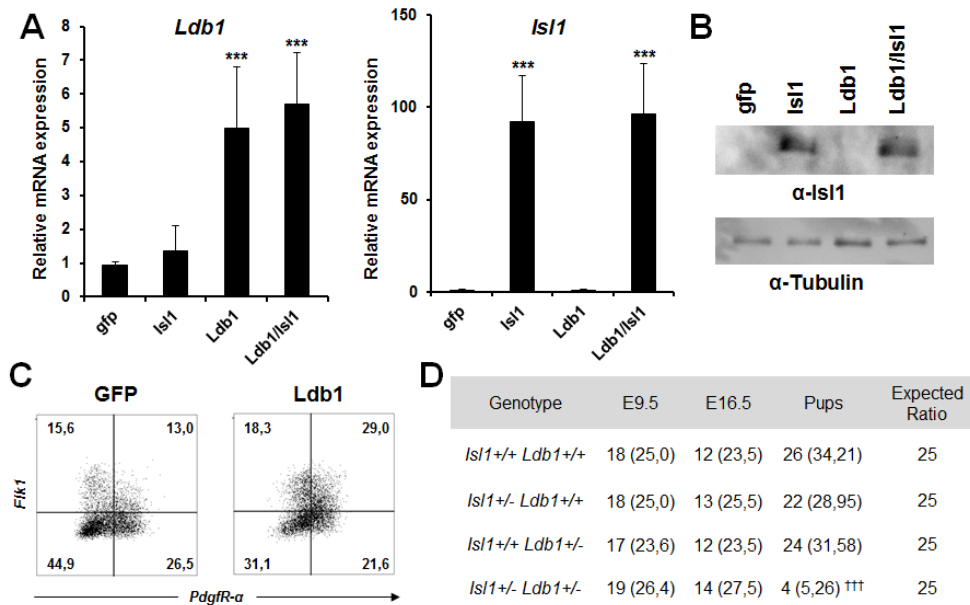

**Figure S2, related to Figure 3. Ldb1 and Isl1 interact to regulate cardiogenesis. (A)** Relative mRNA expression of *Ldb1* and *Isl1* in ES cells overexpressing either GFP alone (control) or together with *Isl1*, *Ldb1* or a combination of *Isl1/Ldb1*. **(B)** Western blot analysis of total protein extracts of ES cells overexpressing either GFP alone (control) or together with *Isl1*, *Ldb1* or *Ldb1/Isl1*, using *Isl1* antibody. Tubulin served as loading control. **(C)** FACS analysis of *Flk-1* and *Pdgfr- $\alpha$*  expression in d3.75 EBs differentiated from ES cells overexpressing either GFP alone (control) or together with *Ldb1*. **(D)** Analysis of the genotype of animals born from the cross *Isl1*<sup>+/-</sup> x *Ldb1*<sup>+/-</sup>. Total numbers (percentage) of recovered embryos or pups for all four different genotypes are shown. <sup>†††</sup>p<0.0001 Chi squared test.

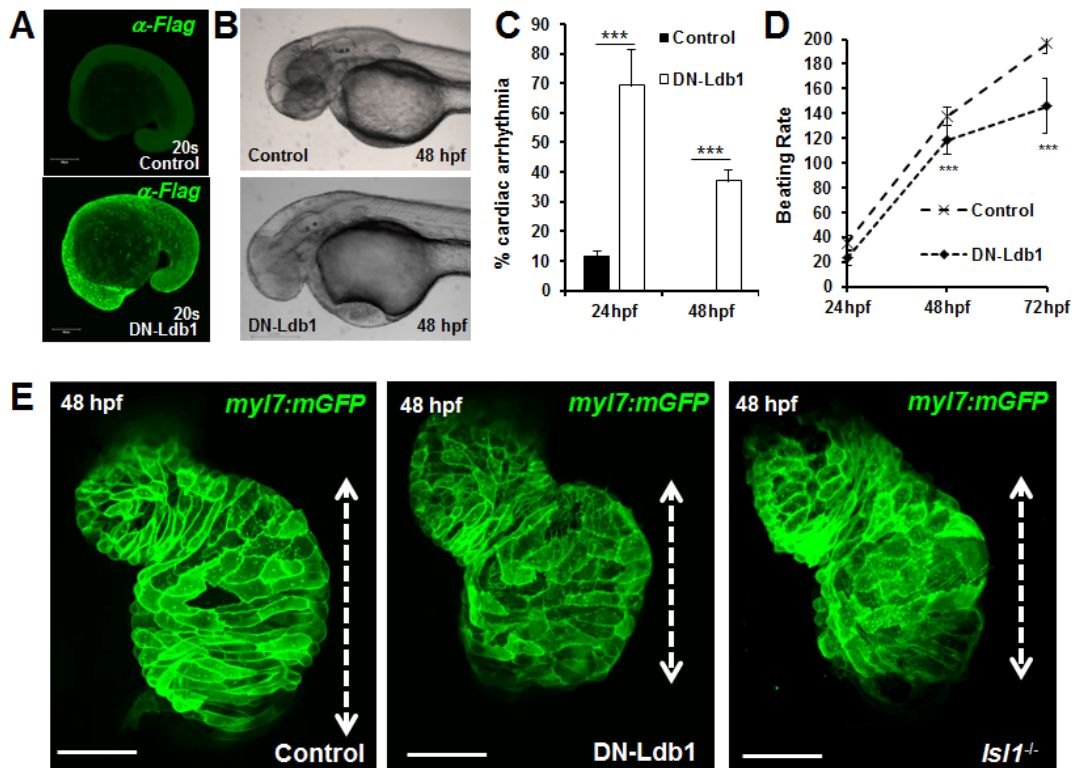

**Figure S3, related to Figure 4. Cardiac morphogenesis defects in zebrafish embryos overexpressing DN-Ldb1. (A)** Confocal images of control and *FLAG-HA-DN-Ldb1* mRNA injected zebrafish embryos, stained with anti-FLAG antibody at 20 somites. **(B)** Control or *DN-Ldb1* mRNA injected *Tg(myI7:EGFP-HsHRAS)<sup>S883</sup>* embryos at 48 hpf. Lateral view, anterior to

the left. **(C-D)** Percentage of embryos with cardiac arrhythmia **(C)** and analysis of the number of heart beats per minute **(D)** measured at 24, 48 and 72 hpf in control and DN-Ldb1 overexpressing zebrafish embryos. **(E)** Confocal images of control, DN-Ldb1 overexpressing and *Isl1* mutant Tg(*myl7:EGFP-HsHRAS*)<sup>S883</sup> hearts, showing shortening of the atrium (dotted lines) in DN-Ldb1 overexpressing and *isl1* mutant embryos.

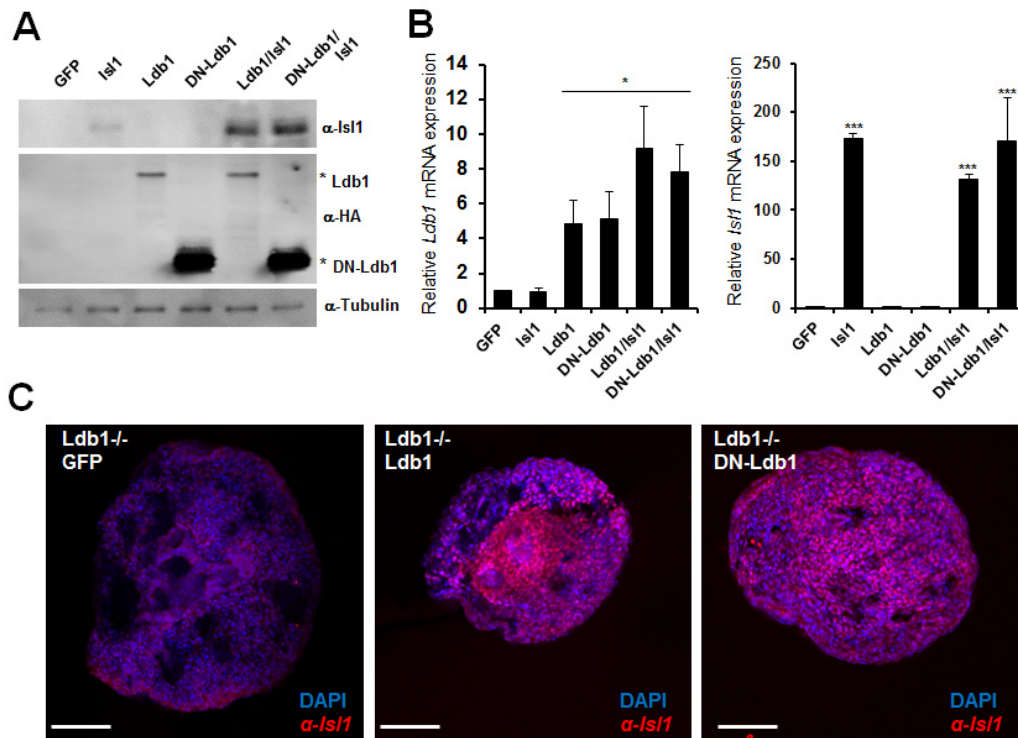

**Figure S4, related to Figure 4. Overexpression of Ldb1 and DN-Ldb1 restores Isl1+ cells.**

**(A)** Western blot analysis of total protein extracts of *Ldb1*<sup>-/-</sup> ES cells overexpressing either GFP alone (control) or together with *Isl1*, *Ldb1*, DN-*Ldb1* or in different combinations. **(B)** Relative mRNA expression of *Ldb1* and *Isl1* in *Ldb1*<sup>-/-</sup> ES cells overexpressing GFP, *Isl1*, *Ldb1*, DN-*Ldb1* or in different combinations. **(C)** *Isl1* immunostaining on vibratome sections of d5 EBs differentiated from *Ldb1*<sup>-/-</sup> ES cells overexpressing either GFP alone (control) or together with *Ldb1* and DN-*Ldb1*. Scale bars, 100 μm.

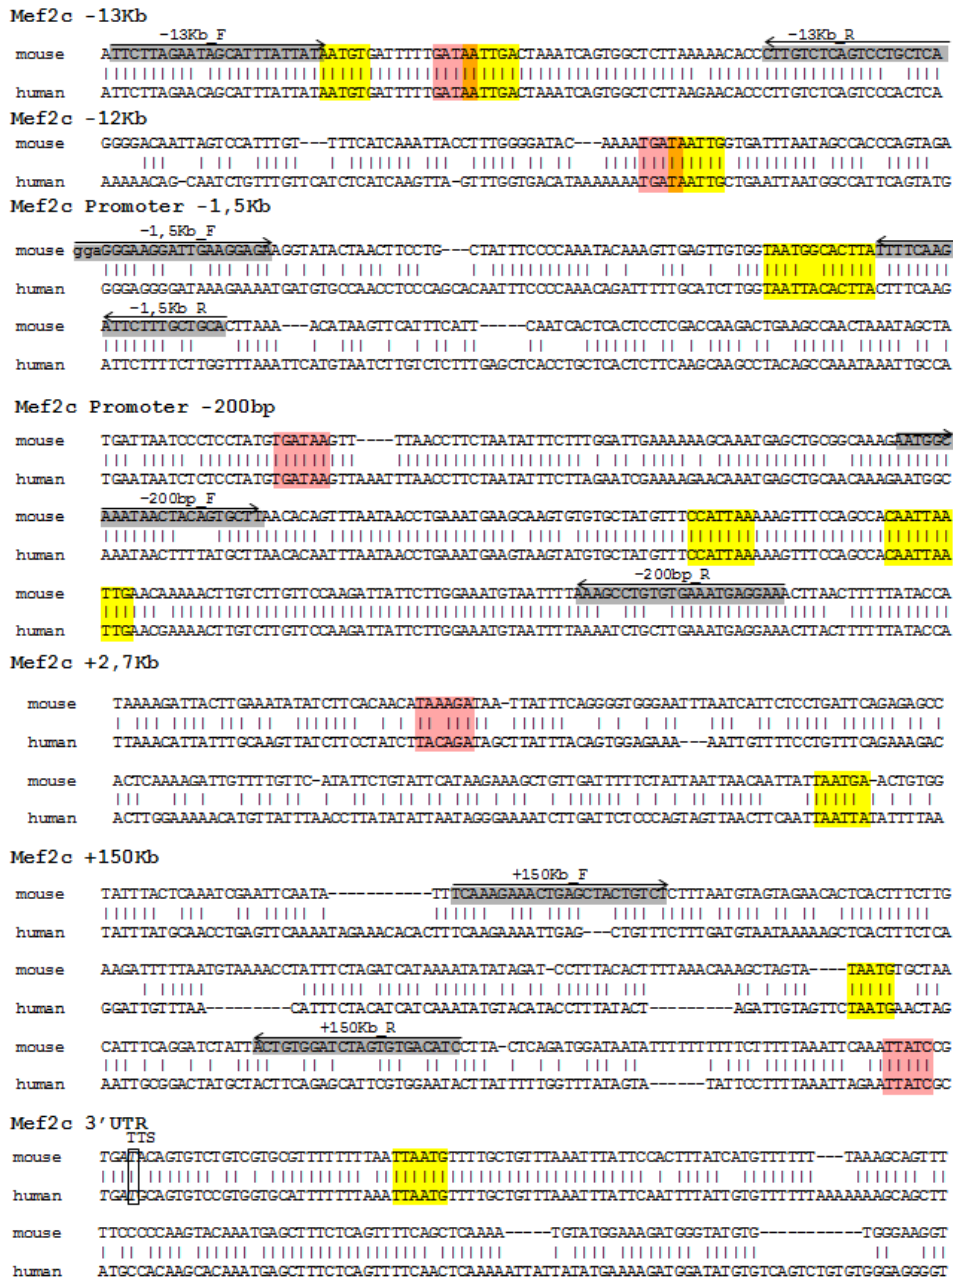

Figure S5, related to Figure 4 and 5. Alignment of conserved mouse and human sequences in the *Mef2c* locus, associated with the AHF enhancer. Consensus sites for Isl1 are shown in yellow and for GATA4 in light red. Primer sequences used for ChIP are shown in grey boxes. TTS, transcription termination site.



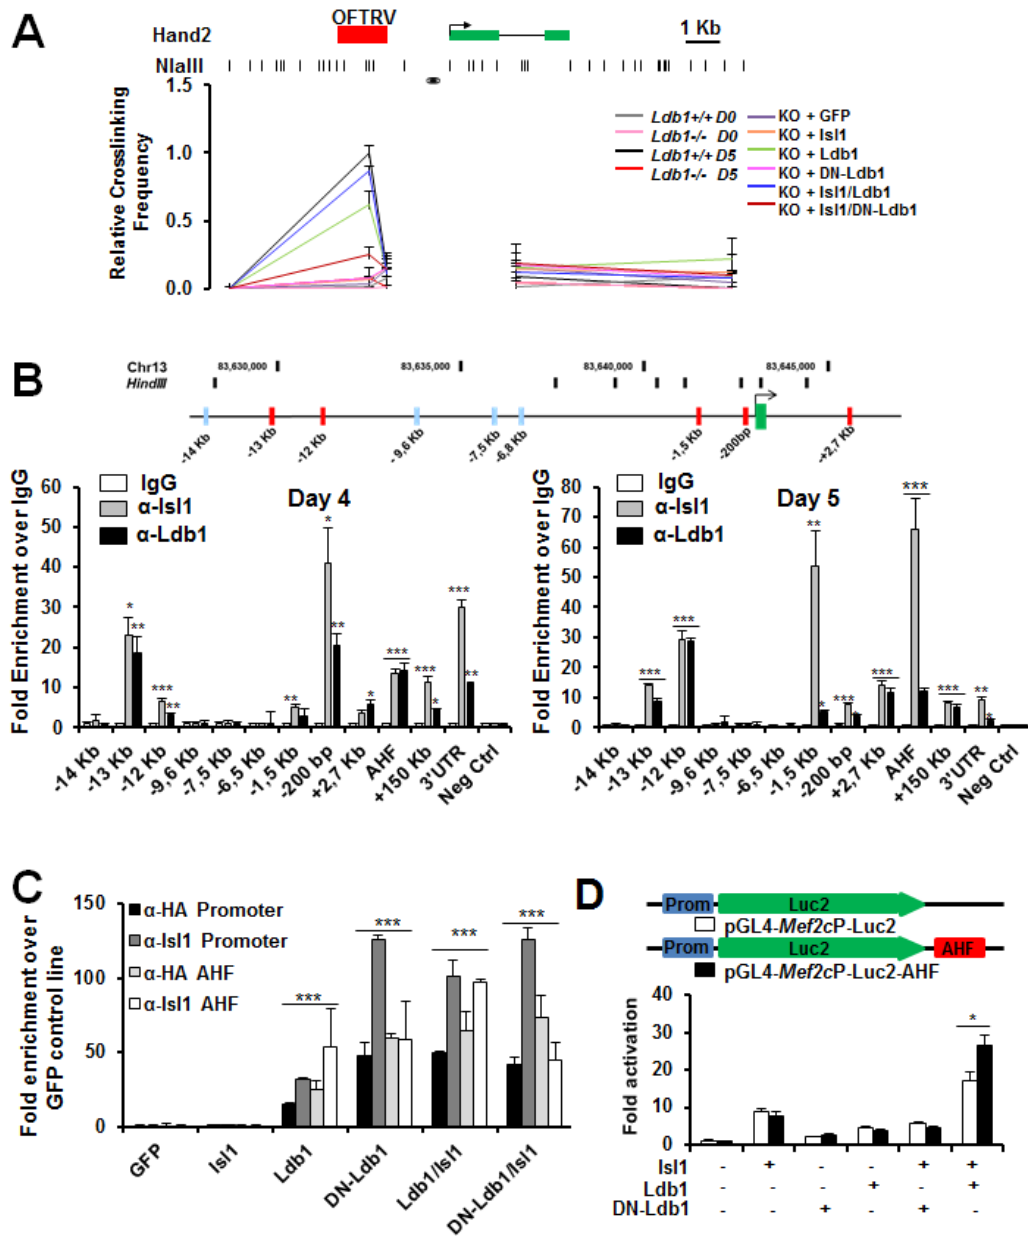

**Figure S7, related to Figure 5. Ldb1 facilitates enhancer-promoter interactions within the *Hand2* and *Mef2c* loci. (A)** Schematic representation of the *Hand2* genomic locus and the position of the NlaIII restriction sites, used in the 3C assay (top). 3C-qPCR analysis of WT, *Ldb1*<sup>-/-</sup> ES cells and d5 EBs derived from WT and *Ldb1*<sup>-/-</sup> ES cells or *Ldb1*<sup>-/-</sup> ES cells overexpressing either GFP alone (control) or together with Isl1, Ldb1, DN-Ldb1, or in different

combinations (bottom). **(B)** CHIP of nuclear extracts from d4 (left) and d5 (right) EBs using anti-Is1 and anti-Ldb1 antibodies or IgG as a control. PCRs were performed using primers flanking conserved Is1 binding sites (red) or not containing Is1 consensus sites (light blue) in the -14 to -5.5 kb region within the *Mef2c* locus found by the 3C-seq in close proximity to the *Mef2c*-AHF. **(C)** CHIP of FLAG-HA-Ldb1 and FLAG-HA-DN-Ldb1 or Is1 of nuclear extracts from d4 EBs using anti-HA and anti-Is1 antibodies. PCRs were performed using primers flanking the conserved Is1 binding sites in the *Mef2c* promoter and the AHF enhancer. Fold enrichment values were calculated relative to the GFP control. Data are mean  $\pm$  SEM, n=3. **(D)** COS7 cells were transiently transfected with a 100 ng luciferase reporter construct containing the *Mef2c* promoter alone or in combination with the AHF enhancer, located downstream of the luciferase gene (Dodou et al., 2004), together with pcDNA (400 ng), Is1 (400 ng), Ldb1 (400 ng), DN-Ldb1 (400 ng) or in combinations. The luciferase levels were normalized for the  $\beta$ -galactosidase activity of a cotransfected RSV-lacZ reporter (10 ng) and presented as fold activation relative to the luciferase levels of the reporter construct alone. All transfections were performed at least three times in triplicates, and representative experiments with the standard deviations are shown. \* $p \leq 0.05$ , \*\* $p \leq 0.01$ , \*\*\* $p \leq 0.005$ .

**Table S1, related to Figure 5 and 6. Peak coordinates of sequences interacting with the *Mef2c*-AHF and the *Mef2c*-promoter in d5 EBs.**



**SUPPLEMENTAL EXPERIMENTAL PROCEDURES:****Plasmids**

pcDNA3-IsI1, pcDNA3-IsI1 $\Delta$ LIM1, pcDNA3-IsI1 $\Delta$ LIM2, pcDNA3-IsI1HOMEO are described elsewhere (Witzel et al. 2012).

Ldb1 and Ldb1 truncated proteins were amplified from mouse cDNA and cloned into the BamHI site of pcDNA3-Flag-HA vector. The following primers were used for amplification:

Ldb1            Ldb1\_F 5' gatccatgtcagtgaggctgtgctgtcc 3'  
                   Ldb1\_R 5' ggatcctcactgggaagcctgtgacgtgg 3'

Ldb1 $\Delta$ LID      Ldb1\_F 5' ggatccatgtcagtgaggctgtgctgtcc 3'  
                   Ldb1 $\Delta$ LID\_R 5' ggatcctcagagagcgaaggctgtggctgggc 3'

DN-Ldb1        DN-Ldb1\_F 5' ggatccatggagcccgcacgacagcagcccag 3'  
                   Ldb1\_R 5' ggatcctcactgggaagcctgtgacgtgg 3'

The pCS2+Flag-HA-DN-Ldb1 plasmid was generated by subcloning the Flag-HA-DN-Ldb1 HindIII - EcoRV insert of pcDNA3-Flag-HA-DN-Ldb1 in the blunted BamHI site of pCS2+. Lentiviral constructs were created by subcloning of the Flag-HA-Ldb1 or the Flag-HA-DN-Ldb1 HindIII - EcoRV insert from pcDNA3 plasmids into the blunted BamHI site of pRRL.sin18-IRES-GFP.

The *Mef2c* promoter and AHF enhancer were cloned from wild type mouse (C57BL/6) genomic DNA in pJet1.2 (Fermentas) and subsequently subcloned in pGL4-luciferase plasmid (Promega).

The following primers were used for amplification:

Mef2cpromoter\_F    5' gagctctcactactgaaagtgtattgac 3'  
 Mef2cpromoter\_R    5' agatcttctccccacccaagcctct 3'  
 Mef2cAHF\_F        5' ggatcccattaaaatagtactctgca 3'  
 Mef2cAHF\_R        5' gtcgacgggccattactttcgaatc 3'

## Synthetic oligonucleotides used in the study

Primers used for RT-PCR analysis:

| Primer Name   | Sequence 5'→3'          | Accession Number |
|---------------|-------------------------|------------------|
| qGAPDH_for    | AACTTTGGCATTGTGGAAGG    | XM_001476707     |
| qGAPDH_rev    | GGATGCAGGGATGATGTTCT    |                  |
| q5'UTRIs1_for | ACAGCACCAGCATCCTCTCT    | NM_021459        |
| q5'UTRIs1_rev | TCCCATCCCTAACAAAGCAC    |                  |
| qIs1_for      | GCGACATAGATCAGCCTGCT    | NM_021459        |
| qIs1_rev      | GTGTATCTGGGAGCTGCGAG    |                  |
| qLdb1_for     | GGGGGGTGGCAACACCAACAACA | NM_001113408     |
| qLdb1_rev     | CCCCCACCACCATCACATCAGGT |                  |
| qNkx2.5_for   | AAGCAACAGCGGTACCTGTG    | NM_008700        |
| qNkx2.5_rev   | GCTGTGCTTGCACCTTGATG    |                  |
| qMef2c_for    | TCCATCAGCCATTTCAACAA    | NM_001170537     |
| qMef2c_rev    | AGTTACAGAGCCGAGGTGGA    |                  |
| qTbx1_for     | CGACAAGCTGAAACTGACCA    | NM_011532        |
| qTbx1_rev     | AATCGGGGCTGATATCTGTG    |                  |
| qTbx20_for    | GCAGCAGAGAACCATCAA      | NM_020496        |
| qTbx20_rev    | GTGAGCATCCAGACTCGTCA    |                  |
| qTbx5_for     | ATGGTCCGTAAGTGGCAAAG    | NM_011537        |
| qTbx5_rev     | ACAAGTTGTGCGATCCAGTG    |                  |
| qGATA4_for    | TCTCACTATGGGCACAGCAG    | NM_008092        |
| qGATA4_rev    | GCGATGTCTGAGTGACAGGA    |                  |
| qHand1_for    | GCGGAAAAGGGAGTTGCCTCAGG | NM_008213        |
| qHand1_rev    | GCTCCAGCGCCAGACTTGC     |                  |
| qHand2_for    | CGGAGAGGCGGAGGCCTTCA    | NM_010402        |
| qHand2_rev    | CAGGGCCAGACGTGCTGTG     |                  |
| qMlc2v_for    | CTGCCCTAGGACGAGTGAAC    | NM_010861        |
| qMlc2v_rev    | CCTCTCTGCTTGTGTGCTCA    |                  |
| qMlc2a_for    | CCCATCAACTTCACCGTCTT    | NM_022879        |
| qMlc2a_rev    | CGTGGGTGATGATGTAGCAG    |                  |
| qTnnt2_for    | ATCCCCGATGGAGAGAGAGT    | NM_011619        |
| qTnnt2_rev    | CTGTTCTCCTCCTCCTCAG     |                  |
| qSM-actin_for | CTGACAGAGGCCACCACTGAA   | NM_007392        |
| qSM-actin_rev | AGAGGCATAGAGGGACAGCA    |                  |
| qSM-22a_for   | AACGACCAAGCCTTCTCTGCC   | NM_011526        |
| qSM-22a_rev   | TCGCTCCTCCAGCTCCTCGT    |                  |
| qSM-mhc_for   | AGGAAACACCAAGGTCAAGCA   | NM_001161775     |
| qSM-mhc_rev   | AGCCTCGTTTCTCCTCCTGA    |                  |
| qBry_for      | AGGGAGACCCACCGAACGC     | NM_009309        |
| qBry_rev      | CCGGGAACATCCTCCTGCCGTT  |                  |
| qEoMes_for    | CAGGGCAGGCGCATGTTTCTT   | NM_010136        |
| qEoMes_rev    | TCCGCTTGGCCGAGGTCAC     |                  |
| qFlk1_for     | GGGTTTGGTTTTGGAAGGT     | NM_010612        |
| qFlk1_rev     | AGGAGCAAGCTGCATCATT     |                  |
| qPDGFra_F     | GGAACCTCAGAGAGAATCGGC   | NM_001083316     |
| qPDGFra_R     | CATAGCTCCTGAGACCCGC     |                  |
| qVE-Cad_for   | TGAGGCAATCAACTGTGCTC    | NM_009868        |
| qVE-Cad_rev   | TTCGTGGAGGAGCTGATCTT    |                  |
| qlrx1_for     | CCTTCTCGCAGATGGGCTCTC   | NM_010573        |
| qlrx1_rev     | TTCGTTGAGCCAGGCTTCA     |                  |
| qPitx2_for    | GTGGACCCTCTCGGAAGTTG    | NM_001042504     |
| qPitx2_rev    | CTCCATTCCCGGTTATCGGC    |                  |
| qMyocd_for    | GCTGAGACTCACCATGACAC    | NM_145136        |
| qMyocd_rev    | TGGACCTTTCAGTGGCGGTA    |                  |
| qFoxC1_for    | CAACATCATGACGTGCTGCTG   | NM_008592        |
| qFoxC1_rev    | CTCTGGCCCCGAGAGTAGG     |                  |
| qBmp2_for     | ATCACGAAGAAGCCGTGGAG    | NM_007553        |
| qBmp2_rev     | CTCGTCACTGGGGACAGAAC    |                  |
| qBmpr2_for    | AGGTGGCCGAACAAATTTCCA   | NM_007561        |
| qBmpr2_rev    | CTTGTGTTGACTCACCTATCTGT |                  |
| qFgfr2_for    | CACGACCAAGAAGCCAGACT    | NM_010207        |
| qFgfr2_rev    | CTCGGCCGAAACTGTTACCT    |                  |
| qSmad3_for    | AAGAAGCTCAAGAAGACGGGG   | NM_016769        |
| qSmad3_rev    | CAGTGACCTGGGGATGTTAAT   |                  |

|             |                          |           |
|-------------|--------------------------|-----------|
| qAcvr2a_for | TCCTACTCAAGACCCAGGACC    | NM_007396 |
| qAcvr2a_rev | TCTGCCAGGACTGTTTGCC      |           |
| qRyr2_for   | GACTGAGGAAGGATCAGGGGA    | NM_023868 |
| qRyr2_rev   | TTGTTGCCGGTCTGAGTTCT     |           |
| qKcnq1_for  | ACTTCACCGTCTTCCTCATTGT   | NM_008434 |
| qKcnq1_rev  | AGAGCGGACCACATATTCTG     |           |
| qKcnj2_for  | TCTCACTTGCTTCGGCTCAT     | NM_008425 |
| qKcnj2_rev  | ACTTGTCCCTGTTGCTGGTACA   |           |
| qFgf10_for  | TGCGGAGCTACAATCACCTC     | NM_00800  |
| qFgf10_rev  | GTTATCTCCAGGACTGTACG     |           |
| qFgf8_for   | GCTGAGCTGCCTGCTGTT       | NM_010205 |
| qFgf8_rev   | GAGAGTGTCAGCTGGGTCC      |           |
| qHDAC2_for  | CCCCTCAGCCCTCTTGTG       | NM_008229 |
| qHDAC2_rev  | TGCCAATATCACCATCATAGTAGT |           |
| qRai_for    | CTTGGTGACAGCAGCGACAG     | NM_198409 |
| qRai2_rev   | CCACGTGGCCTCGGGAT        |           |
| qXrcc4_for  | GCAAACCACGGTATTAGCGG     | NM_028012 |
| qXrcc4_rev  | TGGCTACCTCTCAGTACTCCA    |           |

Primers used for Mef2c isoforms absolute quantification

| Primer Name     | Sequence 5'→3'         |
|-----------------|------------------------|
| Mef2cTotal_for  | ACGAGGATAATGGATGAGCGT  |
| Mef2cTotal_rev  | CAGCTTGTTGGTGCTGTTGAA  |
| Mef2cRefSeq_for | GGCAAAGCTTCGGTGTTTCAT  |
| Mef2cRefSeq_rev | CTGCTGAGGGCTTTGTTGTC   |
| AK0077603_for   | GGTCAGCCTGTCCAAAAGGA   |
| AK0077603_rev   | ACAATGGATGTCAGTTGACCCA |

Primers used for ChIP analysis

| Primer Name        | Sequence 5'→3'          |
|--------------------|-------------------------|
| Mef2c-1,5Kb_for    | CTGATGGAGAGGTTGGGACT    |
| Mef2c-1,5Kb_rev    | ATGCAAGCACCTCTCTCACT    |
| Mef2c-1Kb_for      | CTGATGGAGAGGTTGGGACT    |
| Mef2c-1Kb_rev      | ATGCAAGCACCTCTCTCACT    |
| Mef2c-200bp_for    | GAATGGCAAATAACTACAGTGCT |
| Mef2c-200bp_rev    | TCCTCATTTACACAGGCTT     |
| Mef2c_AHF_for      | TCAGTGTCTGCTCCTGCTTC    |
| Mef2c_AHF_rev      | TTCCCTCCACACCTTACTGG    |
| Mef2c_-13Kb_for    | CTTGCAATTACTACCACTTCACA |
| Mef2c_-13Kb_rev    | CCTTGTCTCAGTCTGCTCA     |
| Mef2c+2,7Kb_for    | GGGGTGGGAATTTAATCA      |
| Mef2c+2,7Kb_rev    | GTCTGGTCAATGAGGAGGT     |
| Mef2c_+150Kb_for   | TCAAAGAAGCTGAGCTACTGTCT |
| Mef2c_+150Kb_rev   | GATGTCACACTAGATCCACAGT  |
| Mef2c_3'UTR_for    | CAGTGTCTGCTGCGTTTT      |
| Mef2c_3'UTR_rev    | ACCCAATTACACCTTCCCA     |
| Mef2c_-9,6Kb_for   | AGTGAAGGAAGAAAAGGTGCA   |
| Mef2c_-9,6Kb_rev   | GCTGGCGTTTGTGTTCTTT     |
| Mef2c_-12Kb_for    | ACCCAGAGACACAGGCATAA    |
| Mef2c_-12Kb_rev    | TTCCCTTTGCGGTTCCAATG    |
| Mef2c_-14Kb_for    | CTCAACTGGTGGTGTAGC      |
| Mef2c_-14Kb_rev    | GCTCAACTGGTGGTGTAGC     |
| Mef2c_-6,5Kb_for   | TGAGGTCCCATTGTTGATGC    |
| Mef2c_-6,5Kb_rev   | TGCTCTCCACAGTTCTTCA     |
| Mef2c_-7,5Kb_for   | TGTGTTCCATTGAGCAGAGG    |
| Mef2c_-7,5Kb_rev   | CCCCAAAGAACATGCATGGT    |
| Hand2_promoter_for | TTACCCCACCCCTGTAATC     |
| Hand2_promoter_rev | AATTGCCGAGGTCTCTTCT     |
| Hand2_OFTRV_for    | CTCAGAGCCAGCCAACTACT    |
| Hand2_OFTRV_rev    | TCACTCCTCACTGACAGCAC    |
| Actin_for          | GGAGCGGACTGGCACAGC      |
| Actin_rev          | ATGCCACACCCGACCCCTA     |
| Intergenic_for     | AAACCTCAAAGCCCAGGACACA  |
| Intergenic_rev     | ACTTGGTCCCAGTTGATGGAA   |

Primers used for 3C-seq Analysis

|                 |                     |
|-----------------|---------------------|
| Mef2cpromoter_F | ACACTTGTGCAGAGGGATC |
| Mef2cpromoter_R | AAGCTTCTAATTTGGGAGC |

Mef2cAHF\_F TTAATTTACTACTAACATTGGAGGATC  
Mef2cAHF\_R AAGCTTGTGCTCTGTGACA

### Primers used for 3C-qPCR Analysis

| Primer Name             | Sequence 5'→3'              |
|-------------------------|-----------------------------|
| 3C_Mef2cAHF             | TTAATTTACTACTAACATTGGAGGATC |
| 3C_Mef2c prom           | GGGTCACACATCAAGGGTCT        |
| 3C_Mef2c-13Kb           | CCTTGCCAGAAATGATCAGC        |
| 3C_Mef2c+2,7Kb          | CCTTTGGCTCTCTCCTATCCT       |
| 3C_Mef2c +150           | GCAGAGATTAGCCAGTCTATGC      |
| 3C_Mef2c 3'UTR          | CCAAGCCGCATATCTACTGC        |
| 3C_Mef2c Negative       | TGTCTGACTCAGCTGTGGAG        |
| 3C_Mef2c Negative2      | ACCCAAGAAATTTTGAACCAA       |
| 3C_Mef2c Negative3      | AACTGCAGCTTGTTCACGT         |
| 3C_Mef2C_Negative4      | TAGGGGTGGCTTCTGGTTTT        |
| 3C_Mef2c Negative5      | TGCTTTCCACATTACTGAAGA       |
| 3C_Ryr2                 | CAAATGTAGTGGTGGGTGCC        |
| 3C_FoxC1                | CAGCCCAAAGATGTTTCAGGT       |
| 3C_Bmpr2                | TGGATGAGTGGATGGGTAGA        |
| 3C_Bmp2                 | CACACGCCATCACTTAGCAG        |
| 3C_Fgf10                | AGTGTTAGGATGCAGGGCTT        |
| 3C_Acvr2a               | ACTCTGAAGGCTGGGAGTTC        |
| 3C_Is1                  | GCTTAAAGAGGCAGGCTCC         |
| 3C_Smad3                | AATATGTCCCAAATGTTTCACAGAA   |
| 3C_Myocd                | CCACCATGGTCACTCTGTCC        |
| 3C_Kcnq1                | AGGAACCACTCTCCCAAAGG        |
| 3C_Kcnj2                | ACCGGTTAGCATGGTTTTAGC       |
| 3C_Rai2                 | GAGAGGCTGGAGGGAAGAAA        |
| 3C_Xrcc4                | GGGTCCATGATTTGCCAAAGA       |
| 3C_Hand2prom            | CGAGCGGCCCTAAAGATGTA        |
| 3C_Hand2 OFTRV_Nlall    | AAGCTTTAGACCCCTGGATTG       |
| 3C_Hand2Negative1_Nlall | CTTCCCTGTCACATCACCCCT       |
| 3C_Hand2Negative2_Nlall | GCATTTCCAGCAAGCATCCT        |
| 3C_Hand2Negative3_Nlall | CTTGTTTGGGGTGAGAAGGG        |
| 3C_Hand2Negative4_Nlall | CACAGGGCAGTTAGGTCTCA        |
| 3C_Hand2 OFTRV_DpnII    | TGTTGTTGTTGGTGGTGGTG        |
| 3C_Hand2Negative1_DpnII | CTAAGGGCTTCTGTTGACACC       |
| 3C_Hand2Negative2_DpnII | CCCATAGGCCTTGTCTGGA         |
| 3C_Hand2Negative3_DpnII | CTAAGGTGGCTGGACTAGG         |
| 3C_Hand2Negative4_DpnII | CGTGTGCTGTGCTTCTCTT         |
| 3C_Actin_F              | CTTCTGACCTAGAACTCTTGATCCC   |
| 3C_Actin_R              | CCCTCTACACACTCAGAATTCATC    |

### Cell Culture and Transfection

HEK293T and COS7 cells were grown in DMEM (Invitrogen) supplemented with 10% FBS (Invitrogen), 2mM L-Glutamine, 100 U/ml Penicillin and 100 µg/ml Streptomycin (Invitrogen) at 37 °C, 5% CO<sub>2</sub>. Undifferentiated embryonic stem (ES) cells were maintained on mouse embryonic fibroblast (MEFs) feeder cells in DMEM supplemented with 15% fetal bovine serum (FBS, Invitrogen), 2 mM L-Glutamine, 0.1 mM 2-mercaptoethanol (Sigma), 0.1 mM non-essential amino acids (Invitrogen), 1 mM sodium pyruvate (Invitrogen), 4.5 mg/ml D-glucose, and 1000 U/ml of leukemia inhibitory factor (LIF ESGRO, Millipore). To induce EB formation, dissociated ES cells were cultured in hanging drops of 500 cells per 15 µl of ES cell medium, in the absence

of LIF. After 2 days in the hanging drop culture, the resulting EBs were transferred to bacterial culture dishes. For the transfection of HEK293T, cells were seeded at a density of  $2 \times 10^6$  cells/10cm dish and transfected with 10-20 $\mu$ g DNA using calcium phosphate precipitation. COS7 were transfected using FuGENE HD Transfection Reagent (Roche), according to the manufacturer instructions. For stable expression, ES cells were transduced with pRRL.Sin18.PGK-GFP-IRES (control construct) and pRRL.Sin18.PGK-GFP-IRES-Is1, pRRL.Sin18.PGK-GFP-IRES-Ldb1, pRRL.Sin18.PGK-GFP-IRES-DN-Ldb1 or in combinations. Transduced cells were FACS sorted for GFP expression and used for EB differentiation.

### **Luciferase Assay**

For Luciferase Assays,  $3 \times 10^4$  COS7 cells were seeded in 24 well plates (details in Figure 6). 48h after transfection, cells were lysed in 100  $\mu$ l lysis buffer (Promega, Luciferase Assay System) and luciferase activity was measured on Mithras LB 940 (Berthold Technologies) according to the Luciferase Assay System Manual (Promega).  $\beta$ -galactosidase assays were performed using CPRG as substrate (Sigma).

### **RNA Isolation, RT-PCR, and Real-Time PCR**

Embryos were dissected, and after removal of the pericardium, the SHF region and the heart were separately collected in cold PBS. RNA from EBs and embryos was isolated using Trizol (Invitrogen). cDNA was synthesized with the High Capacity cDNA Reverse Transcription Kit (Applied Biosystems) and real-time PCR was performed using the SYBR GREEN PCR master mix (Applied Biosystems) on Applied Biosystems StepOnePlus real-time PCR detection system. The cycle numbers were normalized to GAPDH (ES/EBs and embryos). Primer pairs are described in *Synthetic oligonucleotides used in the study* section.

### **Immunofluorescence of Embryoid Bodies (EBs)**

EBs were collected, washed with PBS, embedded in 17% gelatin and fixed overnight at room temperature in 4% PFA. Next day the EBs were sectioned with vibratome at 70  $\mu$ m. The obtained sections were fixed in 2% formaldehyde, 0.1M PIPES, 1.0 mM MgSO<sub>4</sub>, 2.0 mM EGTA

O/N at 4 °C, followed by 1 hour blocking (4% BSA + 0.4% Triton X-100) and incubated with primary and secondary antibodies diluted in blocking solution.

### **Flow Cytometry**

For FACS analysis the EBs were dissociated,  $1 \times 10^6$  cells were washed with 1 ml PBS and blocked in 100  $\mu$ l FACS buffer (10% FBS in PBS) for 1 hour at room temperature. After blocking, the cells were stained with 0.5  $\mu$ g each APC-conjugated anti-Flk1 (e-Bioscience 17-5821-81) and PE-conjugated anti-PDGFR $\alpha$  (e-Bioscience 12-1401-81) or control rat IgG2a K isotype APC- (e-Bioscience 17-4321) or PE-conjugated (e-Bioscience 12-4321) antibodies. After PBS washes, cells were fixed for 10 minutes at room temperature in 2% PFA. Data were acquired on an LSRII flow cytometer (BD) and analyzed using FlowJo software.

### **Chromatin immunoprecipitation**

Embryoid bodies at day 4 or 5 of differentiation were dissociated with trypsin to obtain single cells suspension and resuspended with complete differentiation medium to obtain a concentration of  $10^6$  cells/ml. Cardiogenic region of 30 E8-9 embryos was dissociated with trypsin to obtain single cells, and resuspended in PBS containing 10% FBS. For chromatin immunoprecipitation  $0.5-1.0 \times 10^7$  cells were fixed with 1% formaldehyde for 10 min. Formaldehyde was quenched with glycine at a final concentration of 125 mM and washed three times with PBS. Cells were lysed in L1 lysis buffer (50 mM Tris pH8, 2 mM EDTA pH8, 0.1% NP-40, 10% glycerol) for 5 min, the nuclei were spun down and resuspended in L2 nuclear resuspension buffer (1% SDS, 5 mM EDTA pH8, 50 mM Tris pH8), followed by sonication to fragment the chromatin. The samples were centrifuged, diluted 1:10 with DB-dilution buffer (0.5% NP-40, 200 mM NaCl, 5 mM EDTA, 50 mM Tris pH8) and incubated with primary antibody overnight at 4°C, followed by 3 h incubation with Protein-A/G Sepharose beads (GE Healthcare). Immunoprecipitates were washed two times with NaCl-washing buffer (0.1% SDS, NP-40 1%, 2 mM EDTA, 500 mM NaCl, 20 mM Tris pH8), followed by two washes with LiCl-washing buffer (0.1% SDS, 1% NP-40, 2 mM EDTA, 500 mM LiCl, 20mM Tris pH8) and eluted with EB-

extraction buffer (TE pH8, 2% SDS). Cross-linking was reverted by overnight incubation at 65°C, DNA was purified and subjected to qPCR analysis. Primer pairs are described in *Synthetic oligonucleotides used in the study* section.

### **Chromosome Conformation Capture Assays - 3C-seq and 3C-qPCR**

3C-seq and 3C-qPCR were performed as described in (Stadhouders et al., 2013). In brief,  $10^7$  cells or dissected SHF regions or tails of 20 E8-9 embryos were crosslinked with 2% formaldehyde at room temperature for 10 min, followed by glycine quenching, cell lysis, HindIII (for 3C-seq and 3C-qPCR of the *Mef2c* locus) or NlaIII (or DpnII) digestion (3C-qPCR of the *Hand2* locus), and T4 ligation. As a positive control genomic DNA or bacterial artificial chromosomes (BAC) containing the entire *Mef2c* and *Hand2* loci (Invitrogen) digested with HindIII or NlaIII (or DpnII) respectively were used, and religated to generate random ligation products. Primers sequences are listed in the Supplemental Experimental Procedures. R3Cseq, a R/Bioconductor package, was used for the discovery of long-range genomic interactions in the 3C-seq datasets (Thongjuea et al., 2013).

### **GO Analysis**

GO analysis was performed using DAVID software (Huang da et al., 2009a, b).

### **Histological analysis**

Embryos were dissected in ice cold PBS, fixed in 4% PFA overnight at 4°C, dehydrated in Ethanol and stored at -20°C. For histological analysis, the tissues were incubated in 100% xylol and embedded in paraffin for further processing. Embedded organs were sectioned using an RM2245 microtome (Leica) and Hematoxylin-Eosin (H&E) staining was performed.

### **REFERENCES:**

- Huang da, W., Sherman, B.T., and Lempicki, R.A. (2009a). Bioinformatics enrichment tools: paths toward the comprehensive functional analysis of large gene lists. *Nucleic Acids Res* 37, 1-13.
- Huang da, W., Sherman, B.T., and Lempicki, R.A. (2009b). Systematic and integrative analysis of large gene lists using DAVID bioinformatics resources. *Nat Protoc* 4, 44-57.

Stadhouders, R., Kolovos, P., Brouwer, R., Zuin, J., van den Heuvel, A., Kockx, C., Palstra, R.J., Wendt, K.S., Grosveld, F., van Ijcken, W., *et al.* (2013). Multiplexed chromosome conformation capture sequencing for rapid genome-scale high-resolution detection of long-range chromatin interactions. *Nat Protoc* 8, 509-524.

Thongjuea, S., Stadhouders, R., Grosveld, F.G., Soler, E., and Lenhard, B. (2013). r3Cseq: an R/Bioconductor package for the discovery of long-range genomic interactions from chromosome conformation capture and next-generation sequencing data. *Nucleic Acids Res* 41.
